# Supplementary material for: Synthesis, evaluation and thermodynamics of a 1H-benzo-imidazole phenanthroline derivative as a novel inhibitor for mild steel against acidic corrosion
Source: Royal Society of Chemistry journal article supplement (doi:10.1039/c5ra15002g), 2015-01-01
Supplement: c5ra15002g1.pdf [file c5ra15002g1.pdf]

*Electronic supplementary information for*

**Synthesis, evaluation and thermodynamics of a 1H-benzo-  
imidazole phenanthroline derivative as a novel inhibitor for  
mild steel against acidic corrosion**

Xiaowei Lei<sup>a</sup>, Hongyan Wang<sup>b,\*</sup>, Yaorong Feng<sup>c</sup>, Jianxun Zhang<sup>a</sup>, Xuejiao Sun<sup>c,d</sup>, Suming Lai<sup>b</sup>,

Zhilong Wang<sup>b</sup>, Song Kang<sup>b</sup>

<sup>a</sup> *State Key Laboratory for Mechanical Behavior of Materials, Xi'an Jiaotong University, Xi'an 710049, P.R. China*

<sup>b</sup> *School of Chemistry and Chemical Engineering, Shaanxi Normal University, Xi'an 710062, P.R. China*

<sup>c</sup> *Tubular Goods Research Institute, China National Petroleum Corporation, Xi'an 710077, P.R. China*

<sup>d</sup> *College of Petroleum Engineering, Xi'an Shiyou University, Xi'an 710065, P.R. China*

*\* Corresponding author. E-mail address: hongyan-wang@snnu.edu.cn (H. Y. Wang).*

### **List of table and figure captions (ESI)**

**Table S1** Electrochemical data obtained from potentiodynamic polarization curves of mild steel in 1.0 M HCl at 25 °C, 50 °C, 70 °C and 90 °C with the concentrations of inhibitor.

**Fig. S1** Equivalent circuit used for modeling EIS data of mild steel in 1.0 M HCl.

**Table S2** Electrochemical data obtained from Nyquist plots of mild steel in 1.0 M HCl at 25 °C, 50 °C, 70 °C and 90 °C with the concentrations of inhibitor.

**Table S3** Electrochemical data obtained from potentiodynamic polarization curves of mild steel in 1.0 M HCl with KI and 0.5 mM inhibitor at 90 °C.

**Table S4** Electrochemical data obtained from Nyquist plots of mild steel in 1.0 M HCl with KI and 0.5 mM inhibitor at 90 °C.

**Fig. S2** Surface morphology of sample after weight loss experiment in 1.0 M HCl with 0.5 mM inhibitor and 50 mM KI at 90 °C: (a) front surface and (b) bottom surface.

**Table S1** Electrochemical data obtained from potentiodynamic polarization curves of mild steel in 1.0 M HCl at 25 °C, 50 °C, 70 °C and 90 °C with the concentrations of inhibitor.

| <i>Temp.</i> (°C) | <i>C</i> (mM) | <i>E</i> <sub>corr</sub> (mV) | <i>i</i> <sub>corr</sub> (mA·cm <sup>-2</sup> ) | <i>b</i> <sub>c</sub> (mV·dec <sup>-1</sup> ) | <i>b</i> <sub>a</sub> (mV·dec <sup>-1</sup> ) | <i>C</i> <sub>R</sub> (mg·cm <sup>-2</sup> ·h <sup>-1</sup> ) | <i>θ</i> | <i>I</i> <sub>E</sub> (%) |
|-------------------|---------------|-------------------------------|-------------------------------------------------|-----------------------------------------------|-----------------------------------------------|---------------------------------------------------------------|----------|---------------------------|
| 25                | 0             | -452                          | 14.60 × 10 <sup>-2</sup>                        | -142                                          | 69                                            | 15.3 × 10 <sup>-2</sup>                                       | -        | -                         |
|                   | 0.01          | -456                          | 3.05 × 10 <sup>-2</sup>                         | -110                                          | 71                                            | 3.2 × 10 <sup>-2</sup>                                        | 0.791    | 79.1                      |
|                   | 0.05          | -439                          | 2.70 × 10 <sup>-2</sup>                         | -129                                          | 69                                            | 2.8 × 10 <sup>-2</sup>                                        | 0.815    | 81.5                      |
|                   | 0.1           | -422                          | 2.36 × 10 <sup>-2</sup>                         | -114                                          | 64                                            | 2.5 × 10 <sup>-2</sup>                                        | 0.838    | 83.8                      |
|                   | 0.5           | -409                          | 2.33 × 10 <sup>-2</sup>                         | -92                                           | 66                                            | 2.4 × 10 <sup>-2</sup>                                        | 0.840    | 84.0                      |
|                   | 1.0           | -406                          | 2.31 × 10 <sup>-2</sup>                         | -89                                           | 60                                            | 2.4 × 10 <sup>-2</sup>                                        | 0.842    | 84.2                      |
| 50                | 0             | -411                          | 10.72 × 10 <sup>-1</sup>                        | -135                                          | 61                                            | 11.2 × 10 <sup>-1</sup>                                       | -        | -                         |
|                   | 0.01          | -475                          | 2.37 × 10 <sup>-1</sup>                         | -88                                           | 99                                            | 2.5 × 10 <sup>-1</sup>                                        | 0.779    | 77.9                      |
|                   | 0.05          | -485                          | 2.18 × 10 <sup>-1</sup>                         | -92                                           | 111                                           | 2.3 × 10 <sup>-1</sup>                                        | 0.797    | 79.7                      |
|                   | 0.1           | -487                          | 2.07 × 10 <sup>-1</sup>                         | -81                                           | 91                                            | 2.2 × 10 <sup>-1</sup>                                        | 0.807    | 80.7                      |
|                   | 0.5           | -476                          | 2.01 × 10 <sup>-1</sup>                         | -78                                           | 84                                            | 2.1 × 10 <sup>-1</sup>                                        | 0.813    | 81.3                      |
|                   | 1.0           | -472                          | 1.89 × 10 <sup>-1</sup>                         | -99                                           | 106                                           | 2.0 × 10 <sup>-1</sup>                                        | 0.824    | 82.4                      |
| 70                | 0             | -441                          | 5.23                                            | -137                                          | 94                                            | 54.7 × 10 <sup>-1</sup>                                       | -        | -                         |
|                   | 0.01          | -439                          | 1.08                                            | -76                                           | 96                                            | 11.3 × 10 <sup>-1</sup>                                       | 0.793    | 79.3                      |
|                   | 0.05          | -489                          | 0.86                                            | -114                                          | 133                                           | 9.0 × 10 <sup>-1</sup>                                        | 0.836    | 83.6                      |
|                   | 0.1           | -483                          | 0.62                                            | -107                                          | 105                                           | 6.5 × 10 <sup>-1</sup>                                        | 0.881    | 88.1                      |
|                   | 0.5           | -506                          | 0.55                                            | -86                                           | 88                                            | 5.7 × 10 <sup>-1</sup>                                        | 0.895    | 89.5                      |
|                   | 1.0           | -485                          | 0.50                                            | -89                                           | 92                                            | 5.2 × 10 <sup>-1</sup>                                        | 0.904    | 90.4                      |
| 90                | 0             | -436                          | 26.55                                           | -65                                           | 73                                            | 277.4 × 10 <sup>-1</sup>                                      | -        | -                         |
|                   | 0.01          | -445                          | 4.79                                            | -67                                           | 68                                            | 50.1 × 10 <sup>-1</sup>                                       | 0.820    | 82.0                      |
|                   | 0.05          | -442                          | 3.30                                            | -69                                           | 72                                            | 34.5 × 10 <sup>-1</sup>                                       | 0.876    | 87.6                      |
|                   | 0.1           | -477                          | 1.95                                            | -70                                           | 75                                            | 19.8 × 10 <sup>-1</sup>                                       | 0.927    | 92.7                      |
|                   | 0.5           | -471                          | 1.13                                            | -76                                           | 87                                            | 11.8 × 10 <sup>-1</sup>                                       | 0.957    | 95.7                      |
|                   | 1.0           | -443                          | 0.63                                            | -66                                           | 78                                            | 6.6 × 10 <sup>-1</sup>                                        | 0.976    | 97.6                      |

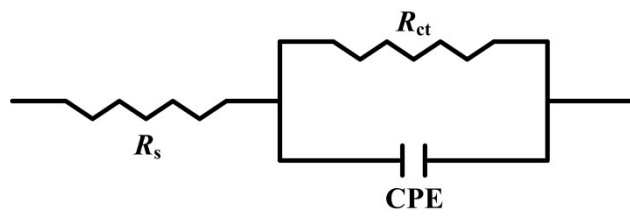

**Fig. S1** Equivalent circuit used for modeling EIS data of mild steel in 1.0 M HCl.

**Table S2** Electrochemical data obtained from Nyquist plots of mild steel in 1.0 M HCl at 25 °C, 50 °C, 70 °C and 90 °C with the concentrations of inhibitor.

| <i>Temp.</i> (°C) | <i>C</i> (mM) | $R_s$ ( $\Omega \cdot \text{cm}^2$ ) | $R_{ct}$ ( $\Omega \cdot \text{cm}^2$ ) | $C_{dl}$ ( $\text{F} \cdot \text{cm}^{-2}$ ) | <i>n</i> | $\theta$ | $I_E$ (%) |
|-------------------|---------------|--------------------------------------|-----------------------------------------|----------------------------------------------|----------|----------|-----------|
| 25                | 0             | 0.65                                 | 175.6                                   | $1.50 \times 10^{-4}$                        | 0.91     | -        | -         |
|                   | 0.01          | 0.48                                 | 557.1                                   | $1.27 \times 10^{-4}$                        | 0.77     | 0.685    | 68.5      |
|                   | 0.05          | 0.36                                 | 679.3                                   | $1.09 \times 10^{-4}$                        | 0.75     | 0.741    | 74.1      |
|                   | 0.1           | 0.43                                 | 714.6                                   | $7.80 \times 10^{-5}$                        | 0.83     | 0.754    | 75.4      |
|                   | 0.5           | 0.33                                 | 976.8                                   | $6.25 \times 10^{-5}$                        | 0.75     | 0.820    | 82.0      |
|                   | 1.0           | 0.40                                 | 1005                                    | $4.58 \times 10^{-5}$                        | 0.80     | 0.825    | 82.5      |
| 50                | 0             | 0.15                                 | 15.86                                   | $4.18 \times 10^{-4}$                        | 0.91     | -        | -         |
|                   | 0.01          | 0.25                                 | 47.21                                   | $3.61 \times 10^{-4}$                        | 0.79     | 0.664    | 66.4      |
|                   | 0.05          | 0.21                                 | 57.22                                   | $2.67 \times 10^{-4}$                        | 0.77     | 0.723    | 72.3      |
|                   | 0.1           | 0.14                                 | 61.26                                   | $2.35 \times 10^{-4}$                        | 0.75     | 0.741    | 74.1      |
|                   | 0.5           | 0.27                                 | 74.68                                   | $1.85 \times 10^{-4}$                        | 0.68     | 0.788    | 78.8      |
|                   | 1.0           | 0.22                                 | 88.11                                   | $1.23 \times 10^{-4}$                        | 0.70     | 0.820    | 82.0      |
| 70                | 0             | 0.27                                 | 5.92                                    | $5.75 \times 10^{-4}$                        | 0.91     | -        | -         |
|                   | 0.01          | 0.59                                 | 19.23                                   | $3.59 \times 10^{-4}$                        | 0.71     | 0.692    | 69.2      |
|                   | 0.05          | 0.28                                 | 24.20                                   | $3.22 \times 10^{-4}$                        | 0.72     | 0.755    | 75.5      |
|                   | 0.1           | 0.37                                 | 29.39                                   | $2.98 \times 10^{-4}$                        | 0.74     | 0.799    | 79.9      |
|                   | 0.5           | 0.33                                 | 42.69                                   | $2.51 \times 10^{-4}$                        | 0.69     | 0.861    | 86.1      |
|                   | 1.0           | 0.37                                 | 48.92                                   | $1.53 \times 10^{-4}$                        | 0.74     | 0.879    | 87.9      |
| 90                | 0             | 0.43                                 | 1.06                                    | $1.54 \times 10^{-3}$                        | 0.92     | -        | -         |
|                   | 0.01          | 0.34                                 | 3.80                                    | $1.46 \times 10^{-3}$                        | 0.72     | 0.721    | 72.1      |
|                   | 0.05          | 0.39                                 | 5.73                                    | $6.77 \times 10^{-4}$                        | 0.70     | 0.815    | 81.5      |
|                   | 0.1           | 0.50                                 | 11.04                                   | $3.39 \times 10^{-4}$                        | 0.74     | 0.904    | 90.4      |
|                   | 0.5           | 0.39                                 | 16.32                                   | $2.90 \times 10^{-4}$                        | 0.74     | 0.935    | 93.5      |
|                   | 1.0           | 0.48                                 | 18.59                                   | $2.21 \times 10^{-4}$                        | 0.81     | 0.943    | 94.3      |

**Table S3** Electrochemical data obtained from potentiodynamic polarization curves of mild steel in 1.0 M HCl with KI and 0.5 mM inhibitor at 90 °C.

| Condition                   | $E_{\text{corr}}$ (mV) | $i_{\text{corr}}$ (mA·cm <sup>-2</sup> ) | $b_c$ (mV·dec <sup>-1</sup> ) | $b_a$ (mV·dec <sup>-1</sup> ) | $C_R$ (mg·cm <sup>-2</sup> ·h <sup>-1</sup> ) | $\theta$ | $I_E$ (%) |
|-----------------------------|------------------------|------------------------------------------|-------------------------------|-------------------------------|-----------------------------------------------|----------|-----------|
| 0.5 mM inhibitor            | -471                   | 1.13                                     | -76                           | 87                            | $11.8 \times 10^{-1}$                         | 0.957    | 95.7      |
| 100 mM KI                   | -469                   | 1.30                                     | -73                           | 74                            | $13.6 \times 10^{-1}$                         | 0.951    | 95.1      |
| 0.5 mM inhibitor +10 mM KI  | -466                   | 0.38                                     | -106                          | 123                           | $4.0 \times 10^{-1}$                          | 0.986    | 98.6      |
| 0.5 mM inhibitor +50 mM KI  | -480                   | 0.24                                     | -102                          | 130                           | $2.5 \times 10^{-1}$                          | 0.991    | 99.1      |
| 0.5 mM inhibitor +100 mM KI | -482                   | 0.23                                     | -94                           | 128                           | $2.4 \times 10^{-1}$                          | 0.991    | 99.1      |

**Table S4** Electrochemical data obtained from Nyquist plots of mild steel in 1.0 M HCl with KI and 0.5 mM inhibitor at 90 °C.

| Condition                   | $R_s$ ( $\Omega$ ·cm <sup>2</sup> ) | $R_{ct}$ ( $\Omega$ ·cm <sup>2</sup> ) | $C_{dl}$ (F·cm <sup>-2</sup> ) | $n$  | $\theta$ | $I_E$ (%) |
|-----------------------------|-------------------------------------|----------------------------------------|--------------------------------|------|----------|-----------|
| 0.5 mM inhibitor            | 0.39                                | 16.32                                  | $2.90 \times 10^{-4}$          | 0.74 | 0.935    | 93.5      |
| 100 mM KI                   | 0.37                                | 14.87                                  | $2.93 \times 10^{-4}$          | 0.85 | 0.929    | 92.9      |
| 0.5 mM inhibitor +10 mM KI  | 0.26                                | 65.62                                  | $4.75 \times 10^{-4}$          | 0.68 | 0.984    | 98.4      |
| 0.5 mM inhibitor +50 mM KI  | 0.39                                | 78.61                                  | $1.61 \times 10^{-4}$          | 0.77 | 0.987    | 98.7      |
| 0.5 mM inhibitor +100 mM KI | 0.39                                | 85.20                                  | $5.82 \times 10^{-5}$          | 0.81 | 0.988    | 98.8      |

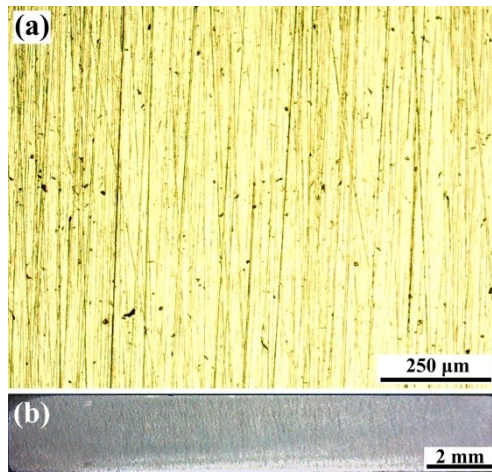

**Fig. S2** Surface morphology of sample after weight loss experiment in 1.0 M HCl with 0.5 mM inhibitor and 50 mM KI at 90 °C: (a) front surface and (b) bottom surface.
